# Supplementary material for: Dynamical origin of near- and below-threshold harmonic generation of Cs in an intense mid-infrared laser field
Source: PubMed Central journal article supplement (PMC4455065; doi:10.1038/ncomms8178), 2015-05-20
Supplement: ncomms8178-s1.pdf [file ncomms8178-s1.pdf]

## Supplementary Figures

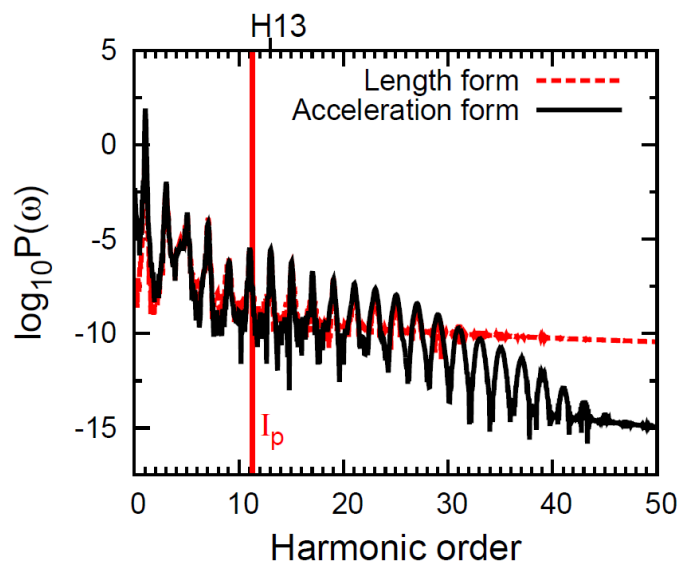

**Supplementary Figure 1:** The high-order harmonic generation (HHG) power spectrum of Cs in the length (red dashed line) and acceleration (black solid line) forms driven by a mid-infrared 3600-nm laser pulse. The red solid line indicates the corresponding ionization threshold marked by  $I_p$ .

## Supplementary Tables

**Supplementary Table 1:** Comparison of the calculated atomic Cs energies with the experimental values (in a.u.). For each angular momentum  $l$ , two rows of energies  $E_{n,l}$  are listed: the first row refers to the calculated model-potential energies, and the second row refers to the experimental values<sup>1</sup>.

| $n$ | Energy $E_{n,l}$         |                          |                          |                          |
|-----|--------------------------|--------------------------|--------------------------|--------------------------|
|     | $l = 0$                  | $l = 1$                  | $l = 2$                  | $l = 3$                  |
| 4   |                          |                          |                          | -0.0316125<br>-0.0315950 |
| 5   |                          |                          | -0.0767537<br>-0.0767681 | -0.0202222<br>-0.0202083 |
| 6   | -0.1430990<br>-0.1430990 | -0.0904542<br>-0.0904751 | -0.0401010<br>-0.0400590 | -0.0140292<br>-0.0140198 |
| 7   | -0.0586446<br>-0.0586446 | -0.0434199<br>-0.0433755 | -0.0243948<br>-0.0243585 | -0.0102970<br>-0.0102905 |
| 8   | -0.0323019<br>-0.0323015 | -0.0257369<br>-0.0257080 | -0.0163741<br>-0.0163492 | -0.0078767<br>-0.0078722 |
| 9   | -0.0204845<br>-0.0204845 | -0.0170564<br>-0.0170386 | -0.0117426<br>-0.0117258 | -0.0062189<br>-0.0062156 |
| 10  | -0.0141531<br>-0.0141531 | -0.0121389<br>-0.0121274 | -0.0088300<br>-0.0088183 | -0.0050341<br>-0.0050316 |

## Supplementary Methods

### 1. *Ab initio* Simulation of the High-order Harmonic Generation Spectra of Cs

In the length gauge, the TDSE in the dipole approximation for an atom interacting with a laser field is given by,

$$i \frac{\partial \psi(\mathbf{r}, t)}{\partial t} = [\hat{H}_0 + \hat{V}(\mathbf{r}, t)]\psi(\mathbf{r}, t), \quad (1)$$

where  $\hat{V}(\mathbf{r}, t)$  is the time-dependent atom-field interaction, and  $\hat{H}_0$  represents unperturbed atom Hamiltonian.  $\hat{H}_0$  is given as

$$\hat{H}_0 = -\frac{1}{2}\nabla^2 + \sum_l |Y_l^0\rangle V_l \langle Y_l^0|, \quad (2)$$

where  $V_l$  is the model potential of atomic Cs for each angular momentum  $l$ , and  $Y_l^0$  is the spherical harmonic.

To obtain the accurate calculation of the harmonic spectra of Cs, an angular-momentum-dependent model potential is constructed as the following form:

$$V_l = -\frac{1}{r} - \frac{\alpha}{2r^4} W_6\left(\frac{r}{r_c}\right) - \left(\frac{N-S}{r} + A_1\right) e^{-B_1 r} - \left(\frac{S}{r} + A_2\right) e^{-B_2 r}, \quad (3)$$

where  $\alpha$  is the Cs<sup>+</sup> core dipole polarizability,  $W_6$  is a core cutoff function<sup>2,3</sup> given by

$$W_n(x) = 1 - \left[1 + nx + \frac{(nx)^2}{2!} + \dots + \frac{(nx)^n}{n!}\right] e^{-nx}, \quad (4)$$

and  $r_c$  is an effective Cs<sup>+</sup> core radius.

In the present work we find it is sufficient to use two different angular-momentum-dependent model potentials, one for states with  $l$  and another for states with  $l \geq 1$ . Supplementary Table I presents a comparison between the bound-state energies predicted by this model potential and the experimental values. The two values are in good agreement.

The TDSE is solved accurately and efficiently by means of the time-dependent generalized pseudospectral method (TDGPS)<sup>4</sup>. Once the time-dependent wave function  $\psi(\mathbf{r}, t)$  is available, we can calculate the expectation value of the induced dipole moment in the length and acceleration forms, respectively,

$$d_L(t) = \langle \psi(\mathbf{r}, t) | z | \psi(\mathbf{r}, t) \rangle, \quad (5)$$

$$\begin{aligned} d_A(t) &= \frac{\partial^2}{\partial t^2} \langle \psi(\mathbf{r}, t) | z | \psi(\mathbf{r}, t) \rangle \\ &= -\langle \psi(\mathbf{r}, t) | [\hat{H}, [\hat{H}, z]] | \psi(\mathbf{r}, t) \rangle. \end{aligned} \quad (6)$$

The high-order harmonic generation (HHG) power spectra in the length and acceleration forms can be obtained by the Fourier transformation of time-dependent dipole moment  $d_L(t)$  and  $d_A(t)$ <sup>2</sup>, respectively,

$$P_L(\omega) = \left| \frac{1}{t_f - t_i} \int_{t_i}^{t_f} d_L(t) e^{-i\omega t} dt \right|^2, \quad (7)$$

$$P_A(\omega) = \left| \frac{1}{(t_f - t_i)\omega^2} \int_{t_i}^{t_f} d_A(t) e^{-i\omega t} dt \right|^2. \quad (8)$$

Supplementary Figure 1 shows the length-form and acceleration-form HHG power spectrum of atomic Cs described by the angular-momentum-dependent model potential in mid-infrared laser field. In calculation, we adopt the same 3600-nm mid-infrared laser pulse with a cosine-squared shape profile, a duration of 20 optical cycles, and an intensity of  $I = 1.4 \times 10^{12} \text{ Wcm}^{-2}$ . In Supplementary Fig. 1 the whole range spectra of the length and acceleration forms are nearly identical. For each harmonic above the ionization threshold, both forms present the same detail structures. Beyond the cut-off region, while the length form spectrum levels off, the acceleration form spectrum reveals more harmonics.

## 2. Synchrosqueezing Transform

We perform the time-frequency analysis on the induced dipole moment  $d(x)$  of atomic Cs interacting with the applied laser field by means of the synchrosqueezing transform (SST)<sup>5-7</sup>. The SST is described as:

$$S(t, \xi) = \int \frac{1}{\sqrt{\omega}} V(t, \omega) \frac{1}{\alpha\sqrt{\pi}} e^{-\left(\frac{\xi - \Omega_f(t, \omega)}{\alpha}\right)^2} d\omega, \quad (9)$$

where  $V(t, \omega)$  is the Morlet wavelet transform,  $\Omega_f(t, \omega)$  is the reallocation rule function, and  $\alpha$  is a smoothing parameter. In this study,  $\alpha = 2.6$ . The Morlet wavelet transform is given as:

$$V(t, \omega) = \int d(x) \sqrt{\omega} W(\omega(x - t)) dx, \quad (10)$$

where

$$W(\zeta) = \frac{1}{\sqrt{\tau}} e^{i\zeta} e^{-\frac{\zeta^2}{2\tau^2}} \quad (11)$$

is the mother wavelet. The reallocation rule function is defined as:

$$\Omega_f(t, \omega) = \begin{cases} \frac{-i\partial_t V(t, \omega)}{V(t, \omega)} & \text{for } V(t, \omega) \neq 0 \\ \infty & \text{for } V(t, \omega) = 0 \end{cases}, \quad (12)$$

where  $\partial_t$  denotes the partial derivative in the temporal axis.

The time profile  $d_{\omega_k}(t_e)$  for some harmonic  $\omega_k$  from the SST analysis can be obtained from the reconstruction function:

$$d_{\omega_k}(t_e) = \Re e \left\{ R_W^{-1} \int_{\xi_1}^{\xi_2} S(t, \xi) \frac{1}{\sqrt{\omega}} d\omega \right\}, \quad (13)$$

where  $(\xi_1, \xi_2)$  is the neighborhood of such harmonic,  $R_W = \int \frac{\widehat{W}(\eta)}{\eta} d\eta$  and  $\widehat{W}(\eta)$  is the Fourier transform of  $W(\zeta)$ , and  $\Re e$  denotes the real part.

## Supplementary References

1. Kramida, A., Ralchenko, Yu., Reader, J., & NIST ASD Team (2013). NIST Atomic Spectra Database (ver. 5.1), [Online]. Available: <http://physics.nist.gov/asd> [2013, December 25]. National Institute of Standards and Technology, Gaithersburg, MD.
2. Chu, X. & Chu, S.I., Laughlin, Cecil. Spectral and temporal structures of high-order harmonic generation of Na in intense mid-ir laser fields. *Phys. Rev. A* **64**, 013406 (2001).
3. Li, P. C., Laughlin, Cecil., & Chu, S.I. Generation of isolated sub-20-attosecond pulses from He atoms by two-color midinfrared laser fields. *Phys. Rev. A* **89**, 023431 (2014).
4. Tong, X. M., & Chu, S. I. Theoretical study of multiple high-order harmonic generation by intense ultrashort pulsed laser fields: A new generalized pseudospectral time-dependent method. *Chem. Phys.* **217**, 119 (1997).
5. Daubechies, I., Lu, J., & Wu, H. T. Synchrosqueezed wavelet transforms: an empirical mode decomposition. *Appl. Comput. Harmon. Anal.* **30**, 2 (2011).
6. Chen, Y. C., Cheng, M. Y., & Wu, H. T. Non - parametric and adaptive modelling of dynamic periodicity and trend with heteroscedastic and dependent errors. *J. R. Stat. Soc. Ser. B Stat. Methodol.* **76**, 3(2014).
7. Sheu, Y. L., Hsu, L. Y., Wu, H. T., Li, P. C., & Chu, S.I. A new time-frequency method to reveal quantum dynamics of atomic hydrogen in intense laser pulses: Synchrosqueezing transform. *AIP Advances* **4**, 117138 (2014).
